# Supplementary material for: X-ray absorption spectroscopy of exemplary platinum porphyrin and corrole derivatives: metal- versus ligand-centered oxidation
Source: Royal Society of Chemistry journal article supplement (doi:10.1039/d1ra06151h), 2021-01-01
Supplement: d1ra06151h1.pdf [file d1ra06151h1.pdf]

## Electronic Supplementary Material

# X-ray Absorption Spectroscopy of Exemplary Platinum Porphyrin and Corrole Derivatives: Metal- versus Ligand-Centered Oxidation

Benjamin D. Matson,<sup>§</sup> Kalle E. Thomas, Abraham B. Alemayehu,<sup>†</sup> Abhik Ghosh\*<sup>†</sup>

Ritimukta Sarangi\*<sup>§</sup>

<sup>§</sup>Stanford Synchrotron Radiation Lightsource, SLAC National Accelerator Laboratory, Stanford  
University, Menlo Park, California 94025, USA;

<sup>†</sup> Department of Chemistry, UiT – The Arctic University of Norway, N-9037 Tromsø, Norway; Email:  
[abhik.ghosh@uit.no](mailto:abhik.ghosh@uit.no) (A.G.), [ritis@slac.stanford.edu](mailto:ritis@slac.stanford.edu) (R.S)

## Optimized Cartesian coordinates (Å)

### Pt<sup>II</sup>[TpCF<sub>3</sub>PP]

|    |              |              |               |
|----|--------------|--------------|---------------|
| Pt | -2.024231000 | -0.004763000 | -1.184205000  |
| F  | -2.672743000 | -9.813141000 | -0.150635000  |
| F  | -2.692277000 | -9.746674000 | -2.331464000  |
| F  | -0.789988000 | -9.817722000 | -1.263360000  |
| F  | -1.384122000 | 9.803899000  | -0.147254000  |
| F  | -1.343915000 | 9.735710000  | -2.327672000  |
| F  | -3.256271000 | 9.809126000  | -1.277768000  |
| F  | -1.476763000 | 1.197729000  | -10.930098000 |
| F  | -1.284213000 | -0.975163000 | -10.995545000 |
| F  | -3.265958000 | -0.049976000 | -10.991168000 |
| F  | -2.593108000 | 1.190733000  | 8.560487000   |
| F  | -2.758214000 | -0.984360000 | 8.626329000   |
| F  | -0.788280000 | -0.034260000 | 8.624540000   |
| N  | -2.016524000 | 1.464466000  | 0.285110000   |
| N  | -2.037020000 | 1.464621000  | -2.653308000  |
| N  | -2.013898000 | -1.473865000 | -2.653667000  |
| N  | -2.029091000 | -1.474208000 | 0.284919000   |
| C  | -2.027397000 | -0.004358000 | -4.651997000  |
| C  | -2.030169000 | 3.463160000  | -1.183864000  |
| C  | -2.021200000 | -0.005073000 | 2.283523000   |
| C  | -2.018199000 | -3.472638000 | -1.184517000  |
| C  | -2.059031000 | -2.831450000 | -2.437514000  |
| C  | -2.063005000 | -1.257479000 | -4.011056000  |
| C  | -1.990546000 | 1.248552000  | -4.010826000  |
| C  | -1.991794000 | 2.822167000  | -2.437019000  |
| C  | -1.979613000 | -2.831577000 | 0.068516000   |
| C  | -1.981030000 | -1.257957000 | 1.642381000   |
| C  | -2.062168000 | 1.247929000  | 1.642603000   |
| C  | -2.066291000 | 2.821921000  | 0.069135000   |
| C  | -2.169085000 | -3.497951000 | -3.714755000  |
| C  | -2.171351000 | -2.534570000 | -4.677744000  |
| C  | -1.883716000 | 2.525785000  | -4.677527000  |
| C  | -1.884341000 | 3.488949000  | -3.714344000  |
| C  | -2.175707000 | 3.488078000  | 1.346444000   |
| C  | -2.173126000 | 2.524746000  | 2.309526000   |
| C  | -1.867634000 | -3.498009000 | 1.345466000   |
| C  | -1.868724000 | -2.534884000 | 2.308793000   |
| C  | -2.029009000 | -0.003553000 | -6.146639000  |
| C  | -0.948864000 | -0.537614000 | -6.865411000  |
| C  | -3.112160000 | 0.529207000  | -6.862141000  |
| C  | -0.946683000 | -0.536999000 | -8.257977000  |
| C  | -3.118659000 | 0.528457000  | -8.254535000  |
| C  | -2.034203000 | -0.005328000 | -8.955112000  |
| C  | -2.032222000 | 4.957677000  | -1.185047000  |
| C  | -3.111801000 | 5.672698000  | -1.724786000  |
| C  | -0.954855000 | 5.677073000  | -0.645094000  |
| C  | -3.117572000 | 7.065556000  | -1.727317000  |
| C  | -0.952305000 | 7.069113000  | -0.648240000  |
| C  | -2.036169000 | 7.766132000  | -1.188826000  |

|   |              |              |               |
|---|--------------|--------------|---------------|
| C | -2.020577000 | -0.004472000 | 3.778198000   |
| C | -3.099275000 | -0.542594000 | 4.496183000   |
| C | -0.940000000 | 0.532358000  | 4.494509000   |
| C | -3.102604000 | -0.541766000 | 5.888694000   |
| C | -0.934702000 | 0.531965000  | 5.886973000   |
| C | -2.017734000 | -0.005712000 | 6.586688000   |
| C | -2.016240000 | -4.967155000 | -1.185756000  |
| C | -0.938274000 | -5.682523000 | -1.728370000  |
| C | -3.092087000 | -5.686261000 | -0.642484000  |
| C | -0.932446000 | -7.075315000 | -1.729951000  |
| C | -3.094550000 | -7.078373000 | -0.644546000  |
| C | -2.012181000 | -7.775651000 | -1.187603000  |
| C | -2.037057000 | -9.280844000 | -1.228086000  |
| C | -2.010128000 | 9.271283000  | -1.230360000  |
| C | -2.017833000 | 0.035649000  | -10.460493000 |
| C | -2.036519000 | 0.035523000  | 8.092027000   |
| H | -2.253896000 | -4.566258000 | -3.852605000  |
| H | -2.257933000 | -2.672185000 | -5.745972000  |
| H | -1.798874000 | 2.663552000  | -5.745870000  |
| H | -1.799930000 | 4.557293000  | -3.852089000  |
| H | -2.263442000 | 4.556167000  | 1.484454000   |
| H | -2.258063000 | 2.662106000  | 3.377912000   |
| H | -1.779627000 | -4.566121000 | 1.483058000   |
| H | -1.781820000 | -2.672532000 | 3.376996000   |
| H | -0.100555000 | -0.948045000 | -6.325317000  |
| H | -3.961457000 | 0.934122000  | -6.319447000  |
| H | -0.103336000 | -0.950083000 | -8.802107000  |
| H | -3.969075000 | 0.930559000  | -8.796013000  |
| H | -3.959273000 | 5.129779000  | -2.133179000  |
| H | -0.109307000 | 5.137279000  | -0.228645000  |
| H | -3.964809000 | 7.606744000  | -2.135965000  |
| H | -0.111233000 | 7.613641000  | -0.230561000  |
| H | -3.945580000 | -0.956290000 | 3.955439000   |
| H | -0.091736000 | 0.940303000  | 3.952476000   |
| H | -3.944826000 | -0.957997000 | 6.432202000   |
| H | -0.086311000 | 0.937408000  | 6.429108000   |
| H | -0.092028000 | -5.139811000 | -2.139583000  |
| H | -3.936478000 | -5.146261000 | -0.223968000  |
| H | -0.086290000 | -7.616740000 | -2.140582000  |
| H | -3.934356000 | -7.622651000 | -0.224069000  |

### **Pt<sup>IV</sup>[TpCF<sub>3</sub>PP]Cl<sub>2</sub>**

|    |              |              |               |
|----|--------------|--------------|---------------|
| Pt | -2.022510000 | -0.007220000 | -1.180226000  |
| Cl | 0.385880000  | -0.001250000 | -1.184634000  |
| Cl | -4.431409000 | -0.013726000 | -1.176487000  |
| F  | -2.714876000 | -9.810806000 | -0.157414000  |
| F  | -2.669094000 | -9.749403000 | -2.338265000  |
| F  | -0.799642000 | -9.820260000 | -1.213485000  |
| F  | -1.356032000 | 9.798499000  | -0.157885000  |
| F  | -1.410275000 | 9.737893000  | -2.338579000  |
| F  | -3.275424000 | 9.801123000  | -1.206255000  |
| F  | -1.492546000 | 1.199666000  | -10.925600000 |
| F  | -1.255388000 | -0.969044000 | -10.988203000 |

|   |              |              |               |
|---|--------------|--------------|---------------|
| F | -3.255676000 | -0.084706000 | -10.986914000 |
| F | -2.549829000 | 1.195629000  | 8.565474000   |
| F | -2.757688000 | -0.975931000 | 8.629893000   |
| F | -0.769432000 | -0.064858000 | 8.624684000   |
| N | -2.012821000 | 1.467823000  | 0.295320000   |
| N | -2.038870000 | 1.468111000  | -2.655394000  |
| N | -2.010546000 | -1.482482000 | -2.655529000  |
| N | -2.028140000 | -1.482422000 | 0.295108000   |
| C | -2.024473000 | -0.006906000 | -4.650614000  |
| C | -2.031818000 | 3.463086000  | -1.179894000  |
| C | -2.015740000 | -0.007458000 | 2.290408000   |
| C | -2.019843000 | -3.477569000 | -1.180406000  |
| C | -2.056869000 | -2.834818000 | -2.429934000  |
| C | -2.058351000 | -1.256494000 | -4.007727000  |
| C | -1.991537000 | 1.242595000  | -4.007703000  |
| C | -1.995578000 | 2.820471000  | -2.429523000  |
| C | -1.982327000 | -2.834704000 | 0.069121000   |
| C | -1.979842000 | -1.256804000 | 1.647359000   |
| C | -2.055164000 | 1.241983000  | 1.647711000   |
| C | -2.063690000 | 2.819986000  | 0.069636000   |
| C | -2.160474000 | -3.497434000 | -3.707272000  |
| C | -2.161047000 | -2.533774000 | -4.670622000  |
| C | -1.892240000 | 2.520211000  | -4.670366000  |
| C | -1.894829000 | 3.483622000  | -3.706779000  |
| C | -2.164963000 | 3.482436000  | 1.347244000   |
| C | -2.159352000 | 2.518965000  | 2.310777000   |
| C | -1.877882000 | -3.497521000 | 1.346240000   |
| C | -1.876307000 | -2.534090000 | 2.309839000   |
| C | -2.024565000 | -0.006661000 | -6.144836000  |
| C | -0.930756000 | -0.517280000 | -6.859352000  |
| C | -3.119762000 | 0.501140000  | -6.859450000  |
| C | -0.927831000 | -0.517896000 | -8.252004000  |
| C | -3.124203000 | 0.498167000  | -8.251950000  |
| C | -2.026895000 | -0.011922000 | -8.950120000  |
| C | -2.036201000 | 4.957302000  | -1.180241000  |
| C | -3.131823000 | 5.668441000  | -1.691047000  |
| C | -0.945179000 | 5.675125000  | -0.667352000  |
| C | -3.139980000 | 7.061337000  | -1.689541000  |
| C | -0.946243000 | 7.067345000  | -0.667685000  |
| C | -2.046074000 | 7.762410000  | -1.177352000  |
| C | -2.012028000 | -0.006880000 | 3.784726000   |
| C | -3.103704000 | -0.517930000 | 4.502245000   |
| C | -0.915499000 | 0.502259000  | 4.496180000   |
| C | -3.103177000 | -0.517509000 | 5.894842000   |
| C | -0.907594000 | 0.500307000  | 5.888758000   |
| C | -2.002758000 | -0.010061000 | 6.589907000   |
| C | -2.020733000 | -4.971823000 | -1.180850000  |
| C | -0.928929000 | -5.686815000 | -1.694538000  |
| C | -3.112990000 | -5.685783000 | -0.665247000  |
| C | -0.925883000 | -7.079752000 | -1.693477000  |
| C | -3.117025000 | -7.078001000 | -0.665970000  |
| C | -2.021096000 | -7.776924000 | -1.178768000  |
| C | -2.046617000 | -9.282849000 | -1.216856000  |

|   |              |              |               |
|---|--------------|--------------|---------------|
| C | -2.026414000 | 9.268472000  | -1.214869000  |
| C | -2.010168000 | 0.027333000  | -10.456131000 |
| C | -2.017074000 | 0.030176000  | 8.095897000   |
| H | -2.240693000 | -4.566189000 | -3.842823000  |
| H | -2.241985000 | -2.669082000 | -5.739365000  |
| H | -1.812439000 | 2.655997000  | -5.739119000  |
| H | -1.817565000 | 4.552603000  | -3.842159000  |
| H | -2.247953000 | 4.550968000  | 1.482816000   |
| H | -2.236836000 | 2.653995000  | 3.379800000   |
| H | -1.797662000 | -4.566313000 | 1.481370000   |
| H | -1.794722000 | -2.669499000 | 3.378507000   |
| H | -0.073529000 | -0.905719000 | -6.317103000  |
| H | -3.978998000 | 0.885198000  | -6.317250000  |
| H | -0.074765000 | -0.912038000 | -8.794911000  |
| H | -3.983149000 | 0.879522000  | -8.794827000  |
| H | -3.988616000 | 5.123641000  | -2.076902000  |
| H | -0.087347000 | 5.135332000  | -0.276862000  |
| H | -3.998876000 | 7.601765000  | -2.074066000  |
| H | -0.095553000 | 7.612911000  | -0.271649000  |
| H | -3.961909000 | -0.907464000 | 3.962324000   |
| H | -0.058021000 | 0.886725000  | 3.951501000   |
| H | -3.954531000 | -0.912021000 | 6.440201000   |
| H | -0.047746000 | 0.882877000  | 6.429308000   |
| H | -0.071071000 | -5.145073000 | -2.082322000  |
| H | -3.967788000 | -5.142899000 | -0.272364000  |
| H | -0.069955000 | -7.623218000 | -2.080352000  |
| H | -3.968657000 | -7.620619000 | -0.267895000  |

**Pt<sup>IV</sup>[TpCF<sub>3</sub>PP](Ar)(Py)**

|    |              |              |              |
|----|--------------|--------------|--------------|
| Pt | 0.868841000  | 8.781260000  | 3.910413000  |
| F  | -8.733720000 | 7.143641000  | 4.485182000  |
| F  | -8.227287000 | 5.060612000  | 4.065036000  |
| F  | -8.204249000 | 5.803279000  | 6.121548000  |
| F  | 9.167338000  | 13.660682000 | 2.008570000  |
| F  | 10.044155000 | 11.671953000 | 2.201466000  |
| F  | 9.263373000  | 12.332015000 | 0.273472000  |
| F  | 3.312600000  | 7.473254000  | 13.297833000 |
| F  | 2.732785000  | 5.408860000  | 12.865841000 |
| F  | 4.744909000  | 6.102498000  | 12.385518000 |
| N  | -0.704857000 | 8.639563000  | 2.684511000  |
| N  | -0.170267000 | 8.044719000  | 5.479332000  |
| N  | 2.562060000  | 9.124158000  | 4.964139000  |
| N  | 1.649998000  | 9.539323000  | 2.232470000  |
| N  | 0.141474000  | 10.968988000 | 4.493537000  |
| N  | -0.741481000 | 2.589956000  | 2.970614000  |
| C  | -0.549305000 | 9.193687000  | 1.438860000  |
| C  | -1.847835000 | 9.136178000  | 0.840432000  |
| C  | -2.722967000 | 8.574456000  | 1.765915000  |
| C  | -1.981121000 | 8.263238000  | 2.965760000  |
| C  | -2.350773000 | 7.759040000  | 4.259073000  |
| C  | -1.492358000 | 7.648039000  | 5.403745000  |

|   |              |              |              |
|---|--------------|--------------|--------------|
| C | -1.788673000 | 7.090703000  | 6.704716000  |
| C | -0.660405000 | 7.176500000  | 7.487426000  |
| C | 0.392921000  | 7.771861000  | 6.697619000  |
| C | 1.749337000  | 8.052286000  | 7.053587000  |
| C | 2.755319000  | 8.660632000  | 6.240414000  |
| C | 4.154256000  | 8.878443000  | 6.525746000  |
| C | 4.736174000  | 9.447777000  | 5.416199000  |
| C | 3.726020000  | 9.606946000  | 4.394105000  |
| C | 3.875876000  | 10.110280000 | 3.057738000  |
| C | 2.867273000  | 10.111198000 | 2.033272000  |
| C | 2.786081000  | 10.682606000 | 0.709008000  |
| C | 1.516452000  | 10.428424000 | 0.196588000  |
| C | 0.778425000  | 9.704322000  | 1.184874000  |
| C | -3.764797000 | 7.325906000  | 4.419674000  |
| C | -4.327355000 | 6.384492000  | 3.542005000  |
| C | -5.654760000 | 5.982779000  | 3.672396000  |
| C | -6.448077000 | 6.519583000  | 4.687295000  |
| C | -5.906433000 | 7.458985000  | 5.570746000  |
| C | -4.580991000 | 7.855129000  | 5.436122000  |
| C | 2.169822000  | 7.648826000  | 8.426435000  |
| C | 2.095428000  | 6.307974000  | 8.839224000  |
| C | 2.487631000  | 5.928669000  | 10.119577000 |
| C | 2.963774000  | 6.888756000  | 11.016452000 |
| C | 3.047603000  | 8.226543000  | 10.623078000 |
| C | 2.652644000  | 8.598958000  | 9.341190000  |
| C | 5.194232000  | 10.690262000 | 2.692738000  |
| C | 5.801196000  | 11.683565000 | 3.482505000  |
| C | 7.028910000  | 12.234122000 | 3.129658000  |
| C | 7.679344000  | 11.804194000 | 1.969855000  |
| C | 7.092959000  | 10.819853000 | 1.170301000  |
| C | 5.864793000  | 10.273034000 | 1.528996000  |
| C | 1.501857000  | 6.849530000  | 3.374111000  |
| C | 2.828852000  | 6.619016000  | 3.013548000  |
| C | 3.236304000  | 5.330087000  | 2.650958000  |
| C | 2.331021000  | 4.275598000  | 2.638247000  |
| C | 0.994940000  | 4.516702000  | 2.995051000  |
| C | 0.578556000  | 5.810931000  | 3.364872000  |
| C | -1.132450000 | 11.197067000 | 4.856999000  |
| C | -1.595221000 | 12.465160000 | 5.194705000  |
| C | -0.707902000 | 13.538689000 | 5.154252000  |
| C | 0.612204000  | 13.302373000 | 4.775741000  |
| C | 0.997431000  | 12.004773000 | 4.453528000  |
| C | -7.892862000 | 6.125471000  | 4.834906000  |
| C | 9.027700000  | 12.367455000 | 1.611342000  |
| C | 3.429976000  | 6.472360000  | 12.385236000 |
| C | 0.039671000  | 3.451846000  | 2.981163000  |
| H | -2.106665000 | 9.480167000  | -0.152313000 |
| H | -3.780587000 | 8.404674000  | 1.617314000  |
| H | -2.739617000 | 6.669440000  | 6.999494000  |
| H | -0.569000000 | 6.857818000  | 8.516280000  |
| H | 4.653767000  | 8.616133000  | 7.447935000  |
| H | 5.779149000  | 9.711149000  | 5.307195000  |
| H | 3.574809000  | 11.225412000 | 0.206251000  |

|   |              |              |              |
|---|--------------|--------------|--------------|
| H | 1.148857000  | 10.736141000 | -0.773526000 |
| H | 3.554256000  | 7.425294000  | 3.009980000  |
| H | 4.272843000  | 5.156975000  | 2.374923000  |
| H | 2.641656000  | 3.275274000  | 2.354953000  |
| H | -0.459121000 | 5.968576000  | 3.634614000  |
| H | -1.787415000 | 10.332191000 | 4.871497000  |
| H | -2.633349000 | 12.600108000 | 5.480837000  |
| H | -1.039254000 | 14.540720000 | 5.411125000  |
| H | 1.338844000  | 14.106995000 | 4.726418000  |
| H | 2.013691000  | 11.773309000 | 4.151952000  |
| H | -3.709102000 | 5.945700000  | 2.764589000  |
| H | -6.067652000 | 5.242572000  | 2.995212000  |
| H | -6.523890000 | 7.881636000  | 6.357935000  |
| H | -4.170805000 | 8.595543000  | 6.116777000  |
| H | 2.426811000  | 4.887756000  | 10.421576000 |
| H | 1.739031000  | 5.556225000  | 8.141107000  |
| H | 2.701516000  | 9.643068000  | 9.045703000  |
| H | 3.405549000  | 8.975275000  | 11.322670000 |
| H | 7.598048000  | 10.480488000 | 0.271484000  |
| H | 7.474739000  | 13.009872000 | 3.744389000  |
| H | 5.291238000  | 12.039248000 | 4.372971000  |
| H | 5.421215000  | 9.498315000  | 0.910713000  |
